# Supplementary material
Source: Research Square preprint supplement (doi:10.21203/rs.3.rs-8708984/v1)
Supplement: Supplementary file 1 [file daf536a25771df73d4d9e531.docx]

**Title**

Prescribed use of anxiolytics, hypnotics, sedatives, and antidepressants in adolescents in Spain: a comprehensive exploratory analysis of gender inequalities

**Journal**

Social Psychiatry and Psychiatric Epidemiology

**Authors**

Campo-Iparragirre, M.1,2,3, Bacigalupe, A.1,2, Martin, U.1,2, Riffe, T1,2,4,5.

**Corresponding author**

Maite Campo Iparragirre

Department of Sociology and Social Work. Faculty of Social and Communication Sciences, University of the Basque Country (UPV/EHU), Barrio Sarriena S/N, Leioa (Biscay) 48940, Spain

Research Group in Social Determinants of Health and Demographic Change‑OPIK

Doctoral Programme in Public Health, Department of Preventive Medicine and Public Health, University of the Basque Country (UPV/EHU)

[maite.campo@ehu.eus](mailto:maite.campo@ehu.eus)

**Supplementary table:** Prevalence Ratios (CI 95%) of AHS and antidepressant consumption in women (reference: men) by age, household income and place of birth according to different adjustments*

|  | **AHS** | | | **ANTIDEPRESSANTS** | | |
| --- | --- | --- | --- | --- | --- | --- |
|  | MODEL 1 | MODEL 2 | MODEL 3 | MODEL 1 | MODEL 2 | MODEL 3 |
|  | **1.61 (1.59 - 1.63)** | **1.45 (1.43 - 1.47)** | **1.38 (1.36 - 1.4)** | **2.35 (2.32 - 2.39)** | **1.93 (1.9 - 1.97)** | **1.84 (1.81 - 1.87)** |
| **Age** | | | | | | |
| 10 | **1.06 (1.00 - 1.11)** | **1.06 (1.00 - 1.11)** | **1.06 (1.00 - 1.11)** | **0.83 (0.72 - 0.97)** | **0.83 (0.71 - 0,96)** | **0,83 (0,72 - 0,97)** |
| 11 | 0,98 (0,93 - 1,03) | 0,98 (0,93 - 1,03) | 0,98 (0,94 - 1,04) | 0,95 (0,84 - 1,07) | 0,92 (0,82 - 1,04) | 0,93 (0,83 - 1,04) |
| 12 | **0,91 (0,86 - 0,96)** | **0,90 (0,85 - 0,95)** | **0,9 (0,85 - 0,95)** | 0,96 (0,87 - 1,05) | 0,92 (0,84 – 1,00) | 0,91 (0,93 – 1,00) |
| 13 | **1,27 (1,21 - 1,34)** | **1,21 (1,53 - 1,28)** | **1,19 (1,14 - 1,25)** | **1,51 (1,41 - 1,62)** | **1,35 (1,26 - 1,45)** | **1,33 (1,24 - 1,42)** |
| 14 | **1,38 (1,32 - 1,45)** | **1,28 (1,22 - 1,34)** | **1,28 (1,22 - 1,34)** | **1,98 (1,87 - 2,1)** | **1,69 (1,60 - 1,79)** | **1,67 (1,59 - 1,78)** |
| 15 | **1,88 (1,81 - 1,96)** | **1,68 (1,62 - 1,76)** | **1,65 (1,58 - 1,72)** | **2,49 (2,38 - 2,61)** | **2,09 (2,00 - 2,19)** | **2,05 (1,96 - 2,14)** |
| 16 | **2,01 (1,94 - 2,09)** | **1,74 (1,68 - 1,81)** | **1,65 (1,58 - 1,71)** | **2,75 (2,64 - 2,86)** | **2,24 (2,15 - 2,33)** | **2,13 (2,05 - 2,22)** |
| 17 | **2,14 (2,07 - 2,22)** | **1,82 (1,76 - 1,88)** | **1,67 (1,61 - 1,73)** | **2,92 (2,81 - 3,03)** | **2,36 (2,72 - 2,45)** | **2,19 (2,11 - 2,27)** |
| 18 | **1,96 (1,90 - 2,02)** | **1,63 (1,58 - 1,68)** | **1,47 (1,42 - 1,51)** | **2,55 (2,46 - 2,63)** | **2,00 (1,93 - 2,07)** | **1,83 (1,77 - 1,89)** |
| **Income level** | | | | | | |
| High income (≥100.000 €) | **1,89 (1,61 - 2,21)** | **1,69 (1,44 - 1,98)** | **1,65 (1,41 - 1,94)** | **2,41 (2,07 - 2,81)** | **2,06 (1,78 - 2,39)** | **2,01 (1,73 - 2,33)** |
| Medium income (18.000-99.999 €) | **1,71 (1,67 - 1,76)** | **1,55 (1,51 - 1,59)** | **1,49 (1,45 - 1,53)** | **2,74 (2,65 - 2,82)** | **2,25 (2,18 - 2,32)** | **2,15 (2,09 - 2,22)** |
| Low income (<18.000 €) | **1,81 (1,77 - 1,86)** | **1,6 (1,56 - 1,64)** | **1,50 (1,47 - 1,54)** | **2,82 (2,74 - 2,90)** | **2,29 (2,22 - 2,36)** | **2,15 (2,09 - 2,21)** |
| Exempt from pharmaceutical copayment | **1,41 (1,38 - 1,44)** | **1,28 (1,25 - 1,31)** | **1,22 (1,19 - 1,25)** | **1,69 (1,64 - 1,74)** | **1,40 (1,35 - 1,44)** | **1,32 (1,29 - 1,36)** |
| **LUGAR DE ORIGEN** | | | | | | |
| Spain | **1,61 (1,59 - 1,63)** | **1,45 (1,42 - 1,47)** | **1,38 (1,36 - 1,4)** | **2,36 (2,31 - 2,40)** | **1,93 (1,9 - 1,97)** | **1,84 (1,80 - 1,87)** |
| European Union | **2,02 (1,78 - 2,3)** | **1,66 (1,46 - 1,89)** | **1,53 (1,35 - 1,74)** | **2,88 (2,50 - 3,33)** | **2,11 (1,83 - 2,45)** | **1,95 (1,69 - 2,25)** |
| Africa | 1,23 (0,99 - 1,52) | 1,07 (0,87 - 1,32) | 1,14 (0,92 - 1,41) | **2,96 (2,26 - 3,89)** | **2,21 (1,69 - 2,9)** | **2,39 (1,83 - 3,13)** |
| Latin America | **1,66 (1,54 - 1,78)** | **1,44 (1,34 - 1,55)** | **1,34 (1,25 - 1,44)** | **2,21 (2,04 - 2,39)** | **1,73 (1,6 - 1,88)** | **1,60 (1,48 - 1,74)** |
| Eastern Mediterranean | 1,01 (0,98 - 1,23) | 1,04 (0,93 - 1,16) | 1,01 (0,9 - 1,13) | **2,08 (1,75 - 2,46)** | **1,91 (1,61 - 2,27)** | **1,84 (1,56 - 2,19)** |

*Model 1: adjusted by age; Model 2: adjusted by age and anxiety and depression diagnoses; Model 3: adjusted by age, depression and anxiety diagnoses and visits to primary care
